# Supplementary material for: Vidjil: A Web Platform for Analysis of High-Throughput Repertoire Sequencing
Source: PubMed Central journal article supplement (PMC5106020; doi:10.1371/journal.pone.0166126), 2016-11-11
Supplement: pone.0166126.s001.pdf [file pone.0166126.s001.pdf]

# Vidjil: High-throughput analysis of immune repertoire

## Supplementary Material

### Installation and running instructions

**Web application usage, with server.** Two options are provided to run Vidjil.

- The test server <http://app.vidjil.org> is run by Université de Lille, SIRIC ONCOLille and University of Bristol as a service for the community. As disk space is shared by all the users, we set a limit of 50 GB per user. The detailed help of the web application, from the point of view of the user, is in the file `doc/browser.org`<sup>1</sup>.
- The server can also be installed on a private network. Detailed instructions on how to install the server are provided in `doc/server.org`.

**Standalone usage, without server.** It is also possible to run locally the algorithm and the visualization, without connecting them to a server. The algorithm (C++) can be run from command line. Detailed compilation and run instructions are found in `doc/algo.org`. The algorithm outputs a `.vidjil` file that can directly be fed to the visualization (opened by loading the file `browser/index.html` in a web browser) in the `import/export` menu.

### Test data

The test data can be found at <http://vidjil.org/data>. Vidjil was launched on the dataset using the following parameters.

**Patient L3.** `-3 -z 100 -r 1 -g germline`

**Patient L4.** `-3 -z 100 -r 1 -g germline -i`  
(note the additional `-i` for incomplete recombinations).

---

<sup>1</sup>These files are provided in the code archive sent with the submission, as well as on <http://www.vidjil.org>. Moreover, they are available online on the public git server.
